# Supplementary material
Source: PubMed Central journal article supplement (PMC4197045)
Supplement: embr0015-0878-sd2.pdf [file embr0015-0878-sd2.pdf]

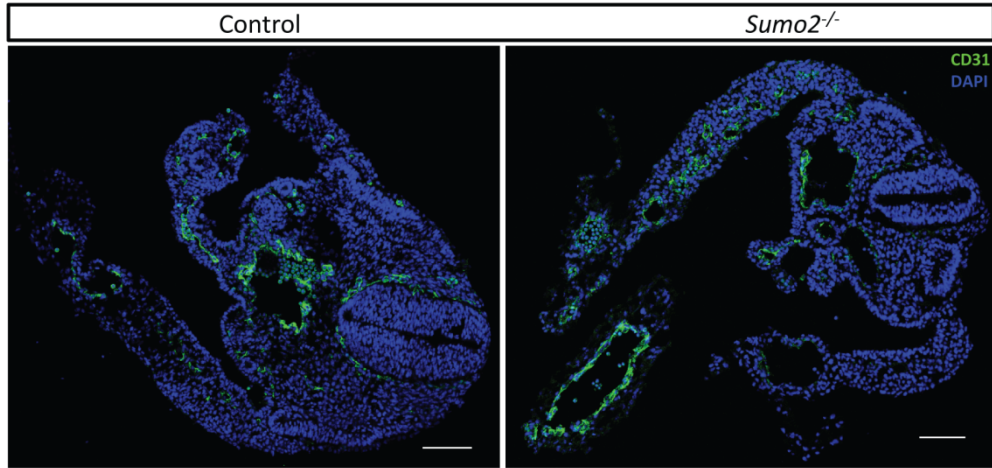

**Figure S2.** Vasculogenesis in *Sumo2* mutant embryos. Cross-sections of E9.5 embryos (control and *Sumo2*<sup>-/-</sup> mutant) were stained for CD31 (BD Biosciences). Scale bar: 100  $\mu$ m.
