# Supplementary material
Source: PubMed Central journal article supplement (PMC4197045)
Supplement: embr0015-0878-sd3.pdf [file embr0015-0878-sd3.pdf]

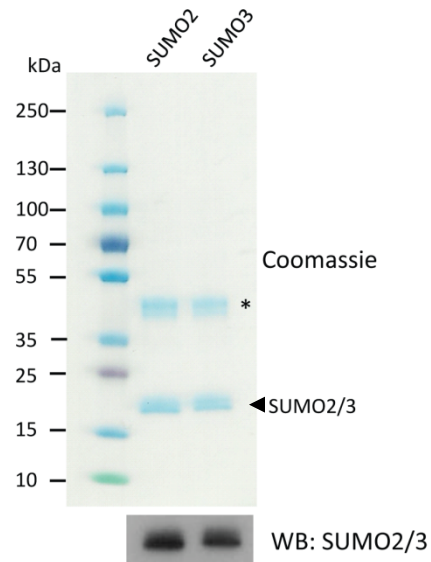

**Figure S3.** Comparable affinity of the anti-SUMO2/3 antibody to SUMO2 and SUMO3 proteins. Same amount of purified unconjugated SUMO2 and SUMO3 proteins were separated on SDS-PAGE gel and proteins were detected by Coomassie staining (upper) and Western blotting (lower) using the anti-SUMO2/3 antibody. \*, unknown protein.
