# Supplementary material
Source: PubMed Central journal article supplement (PMC4197045)
Supplement: embr0015-0878-sd4.pdf [file embr0015-0878-sd4.pdf]

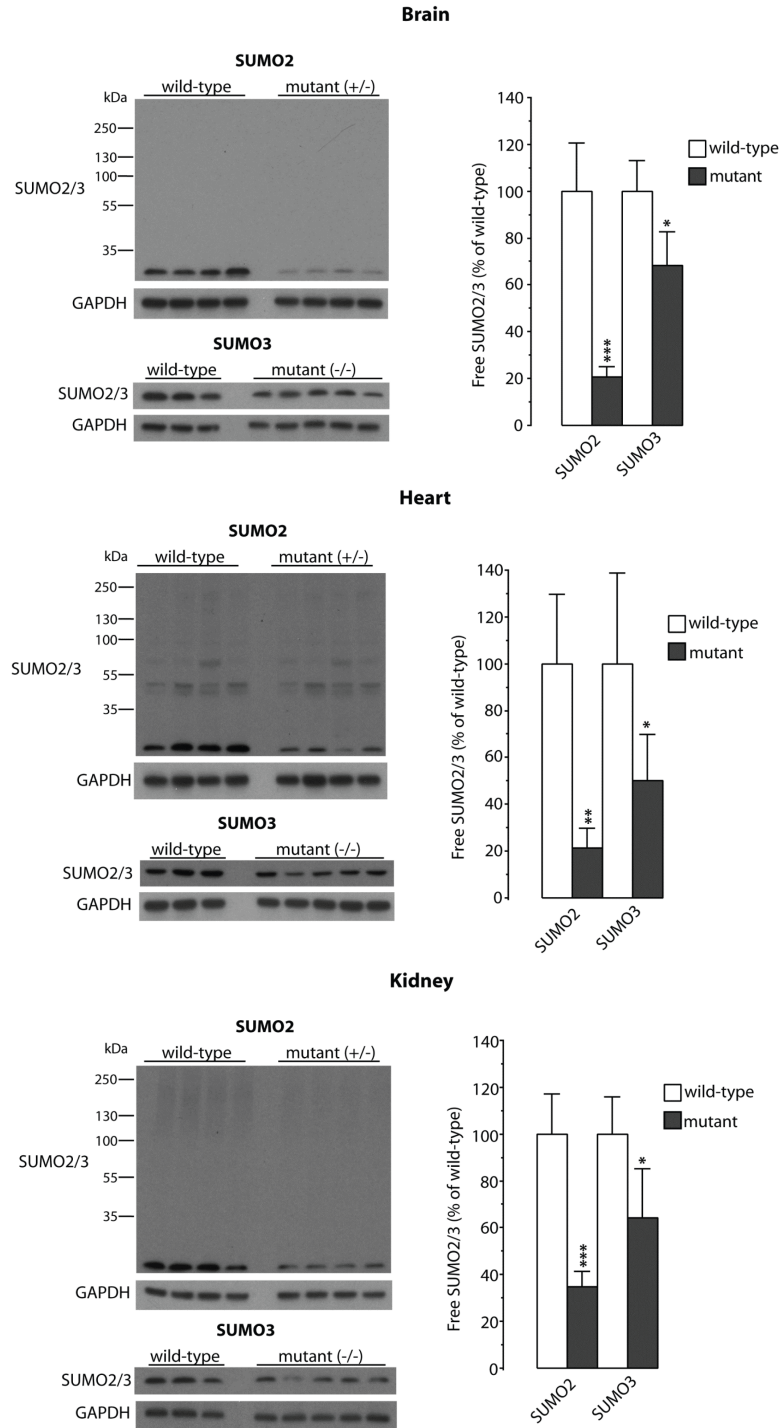

**Figure S4.** Substantial reduction of free SUMO2/3 in different organs of *Sumo2*<sup>+/-</sup> mice compared with *Sumo3*<sup>-/-</sup> mice. Total proteins were extracted from brains, hearts, and kidneys of wild-type and mutant 8–10 months-old mice. Blots (left) were probed with anti-SUMO2/3 antibody. GAPDH served as loading control. Bar graphs (right) show relative amount of free SUMO2/3 in *Sumo2*<sup>+/-</sup> and *Sumo3*<sup>-/-</sup> mice compared with their control littermates corrected for GAPDH. Data are presented as means ± SD (n=4 for *Sumo2*<sup>+/+</sup> and *Sumo2*<sup>+/-</sup> mice; n=3 for *Sumo2*<sup>+/+</sup> mice, and n=5 for *Sumo3*<sup>-/-</sup> mice; \**P* < 0.05, \*\**P* < 0.01, \*\*\**P* < 0.001).
