# Supplementary material
Source: PubMed Central journal article supplement (PMC4197045)
Supplement: embr0015-0878-sd5.pdf [file embr0015-0878-sd5.pdf]

**A**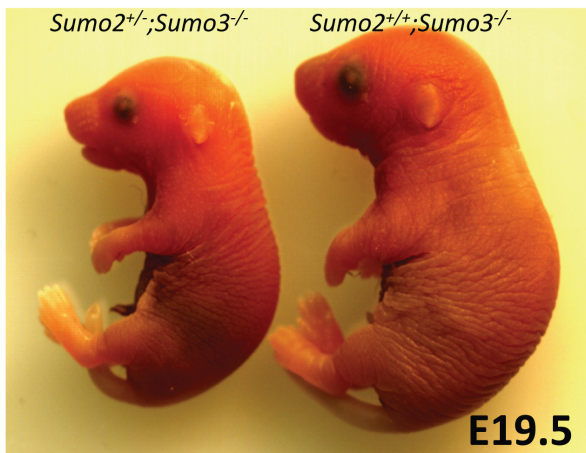**B**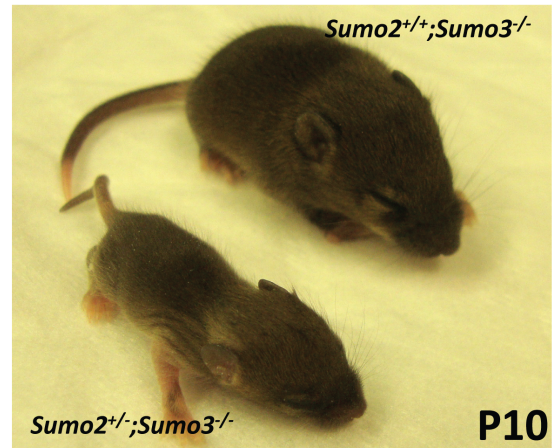

**Figure S5.** Defective development of *Sumo2*<sup>+/-</sup>;*Sumo3*<sup>-/-</sup> embryos. A, Representative image of *Sumo2*<sup>+/-</sup>;*Sumo3*<sup>-/-</sup> and *Sumo2*<sup>+/-</sup>;*Sumo3*<sup>-/-</sup> E19.5 embryos. B, Comparison of a *Sumo2*<sup>+/-</sup>;*Sumo3*<sup>-/-</sup> and a *Sumo2*<sup>+/-</sup>;*Sumo3*<sup>-/-</sup> mouse at postnatal day 10 (P10).
