# Supplementary material
Source: PubMed Central journal article supplement (PMC4197045)
Supplement: embr0015-0878-sd6.pdf [file embr0015-0878-sd6.pdf]

Table S1. List of primer sequences.

| Purpose          | Gene                                    | Primer sequences (5' ->3')                                                                         |                                                                                                      |
|------------------|-----------------------------------------|----------------------------------------------------------------------------------------------------|------------------------------------------------------------------------------------------------------|
| Gene targeting   | <i>Sumo2</i>                            | 5'homologous arm forward:<br>GATATAGGTACCGTTGAGTAGGGGTGAGAAACG                                     |                                                                                                      |
|                  |                                         | 5'homologous arm reverse*:<br>AATATAGTCGAC <u>TCATTA</u> TTTCTCGTCGGCCATGGCGAGC                    |                                                                                                      |
|                  | <i>Sumo3</i>                            | 5'homologous arm forward:<br>ATAAATGGCGCGCCATGCGTCCTTGTGGAAGACC                                    |                                                                                                      |
|                  |                                         | 5'homologous arm reverse*:<br>CTATAAGTCGAC <u>TCATTA</u> CTTCTCTTCCGACATGGTTGC                     |                                                                                                      |
| Genotyping       | <i>Sumo2</i>                            | Forward: AAGCGGCAGCCAATGAGAAGC<br>Reverse: CACCGGTCCGCACGGTGAGG<br>Reverse: TCAGGGTTATTGTCTCATGAGC |                                                                                                      |
|                  |                                         | <i>Sumo3</i>                                                                                       | Forward: ATTCGCAACCGTCCTGAATCG<br>Reverse: AATCTGCTGCGGCTTGCGTACC<br>Reverse: TCAGGGTTATTGTCTCATGAGC |
|                  | Whole-mount<br>in situ<br>hybridization |                                                                                                    | <i>Sumo1</i>                                                                                         |
|                  |                                         | <i>Sumo2</i>                                                                                       |                                                                                                      |
| <i>Sumo3</i>     |                                         |                                                                                                    | Forward: AGCGTGACTCGCCCGCTC<br>Reverse: CCTGGCCACAGGAGGAAG                                           |
|                  |                                         | <i>Hnf4</i>                                                                                        | Forward: CACAGCCATCACCACCAA<br>Reverse: ACAGATGCAAAGCTCGCC;                                          |
| <i>Brachyury</i> |                                         |                                                                                                    | Forward: TGAGAGGTACCCAGCTCTAAGG<br>Reverse: GGACCCTACCTAGCAAAGGACT                                   |
|                  |                                         | <i>Otx2</i>                                                                                        | Forward: TCCAGCTCGGGAAGTGAG<br>Reverse: AGGCCATGACCTTCCCTC                                           |
| qRT-PCR          | <i>Sumo1</i>                            | Forward: CAGGAGGCAAACCTTCAAC<br>Reverse: CTCCATTCCCAGTTCTTTCG                                      |                                                                                                      |
|                  | <i>Sumo2</i>                            | Forward: ACGAGAAACCCAAGGAAGGA<br>Reverse: CTCCATTCCAAGTGTGCAG                                      |                                                                                                      |
|                  | <i>Sumo3</i>                            | Forward: AGAAGCCCAAGGAGGGTGT<br>Reverse: CCTCGGGAGGCTGATCCT                                        |                                                                                                      |

\* Two in-frame stop codons are marked as boxed text and the star codons are marked as underlined.
