# Supplementary material
Source: PubMed Central journal article supplement (PMC4197045)

Source data for the Fig. 4B: SUMO2/3 Western blot

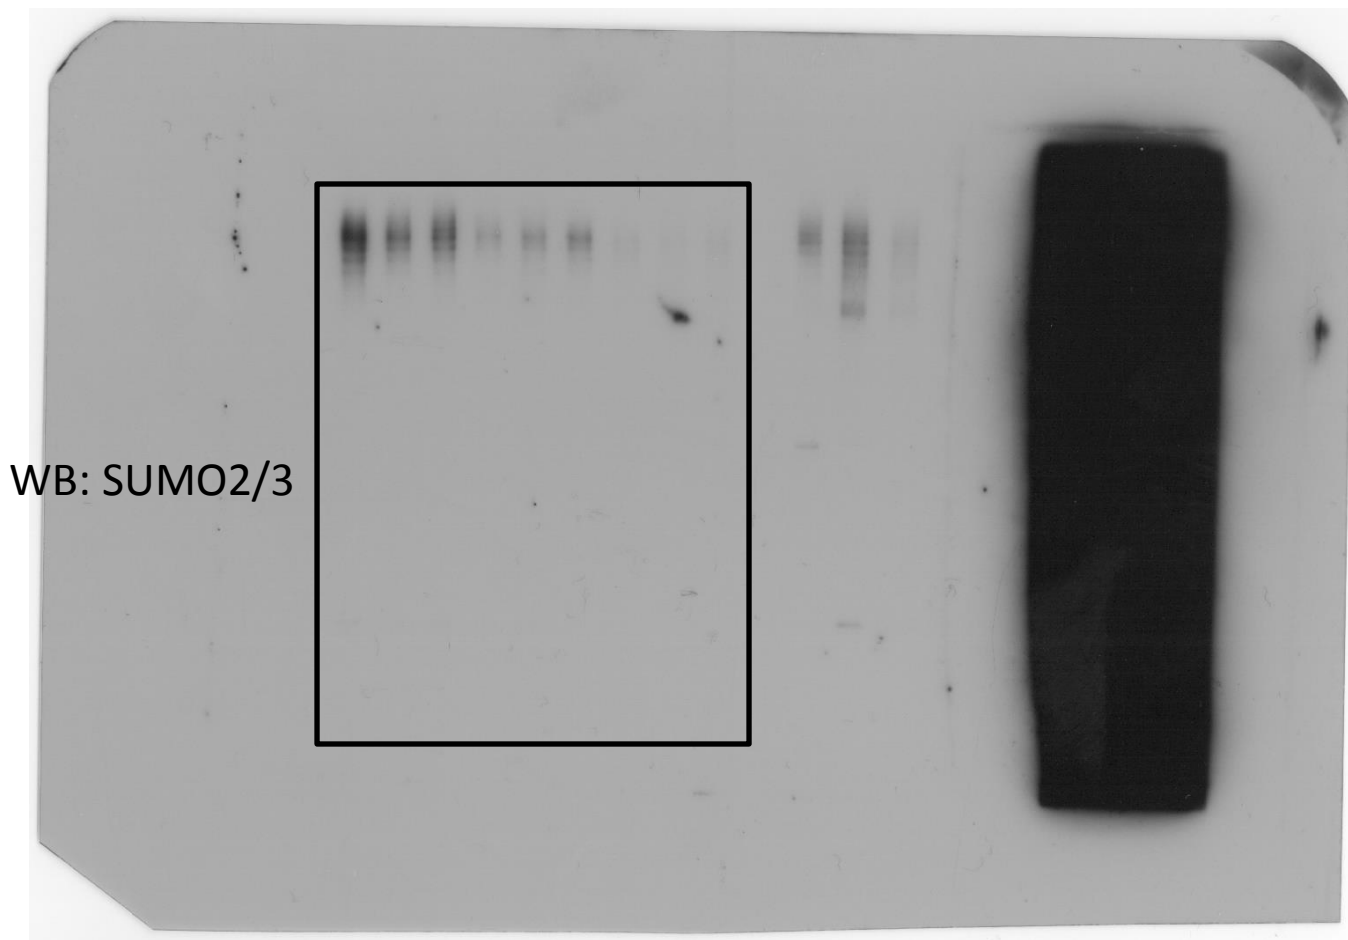

Short exposure

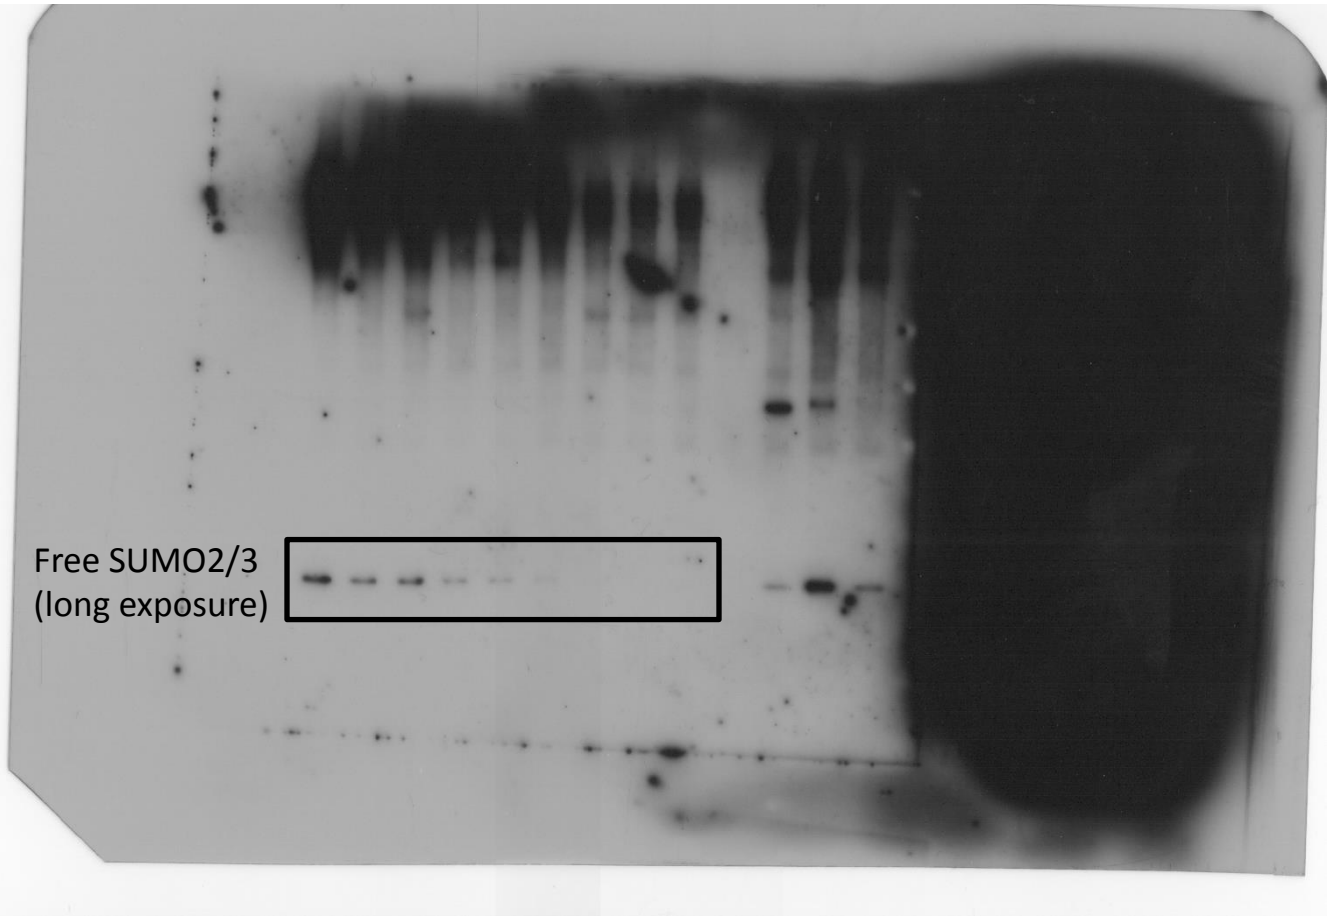

Long exposure

WB:  $\beta$ -actin

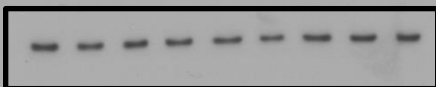

Supplement: embr0015-0878-sd8.pdf [file embr0015-0878-sd8.pdf]
